# Supplementary material
Source: PubMed Central journal article supplement (PMC1976350)

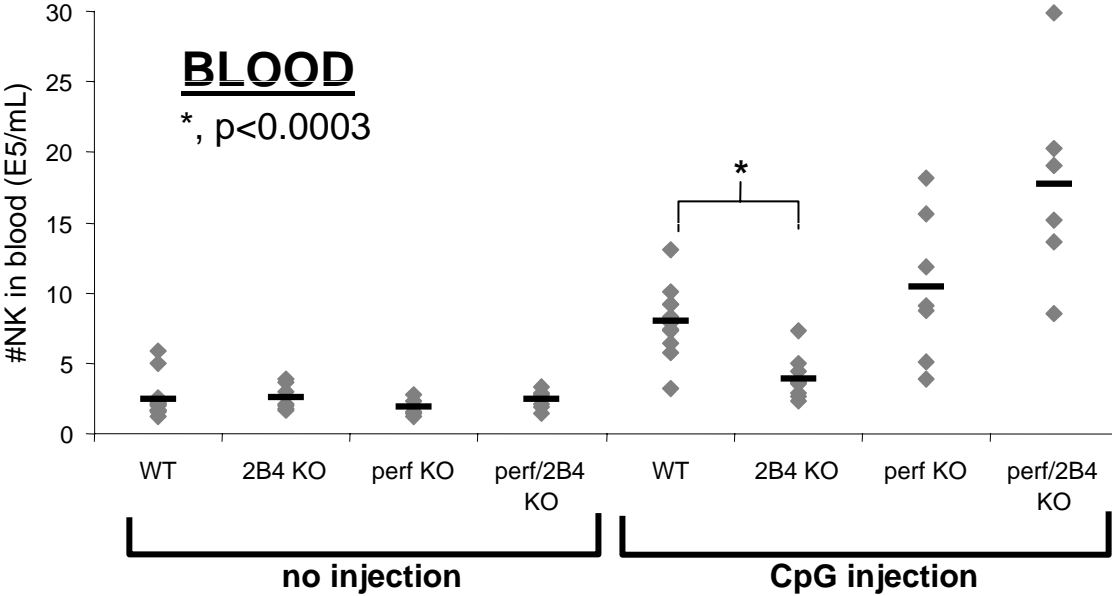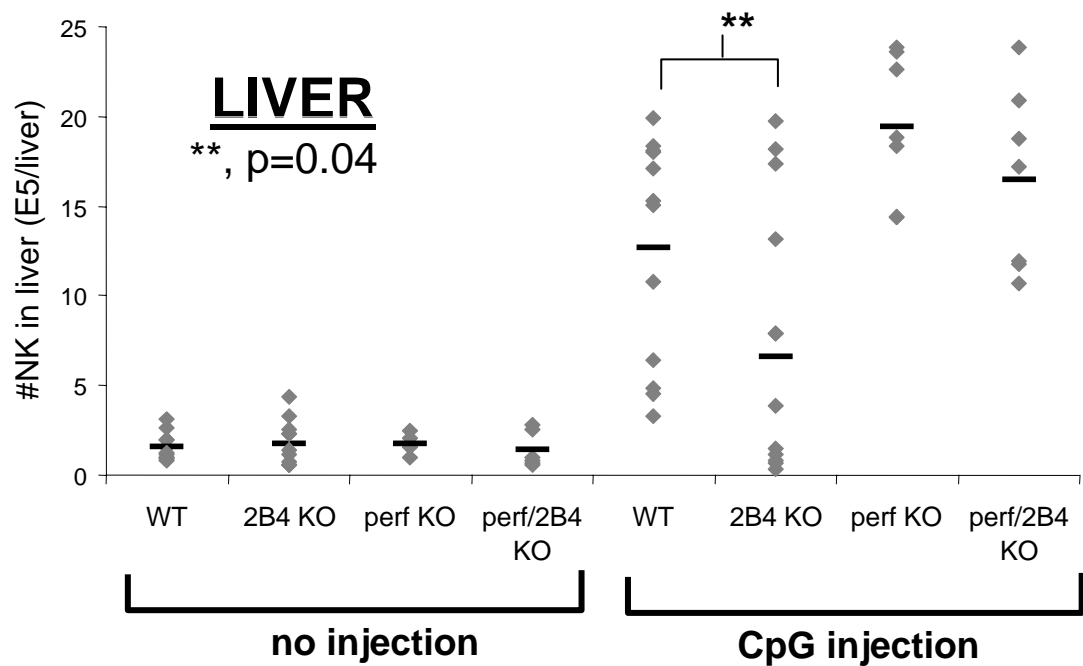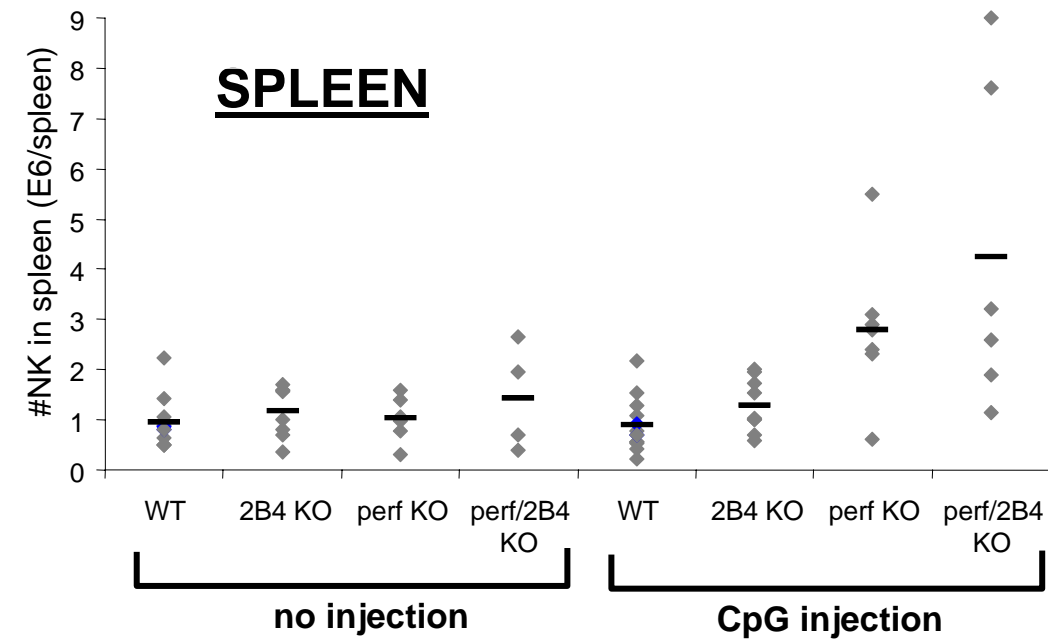

Supplement: blood_blood-2007-02-076927_1.pdf [file blood_blood-2007-02-076927_1.pdf]

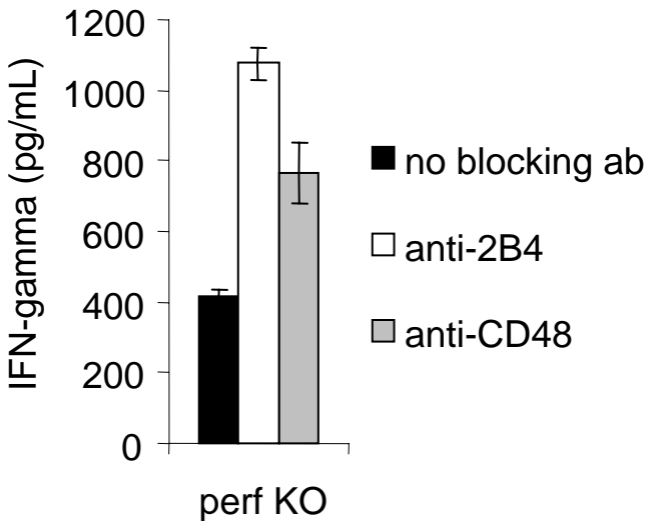

Supplement: blood_blood-2007-02-076927_2.pdf [file blood_blood-2007-02-076927_2.pdf]
